# Supplementary material for: Lobatamunsolides A–C, Norlignans from the Roots of Pueraria lobata and their Nitric Oxide Inhibitory Activities in Macrophages
Source: Biomolecules. 2019 Nov 20;9(12):755. doi: 10.3390/biom9120755 (PMC6995531; doi:10.3390/biom9120755)
Supplement: Supplementary file 1 [file biomolecules-09-00755-s001.pdf]

## Supporting Information

---

### **Lobatamunsolides A-C, Norlignans from the Roots of *Pueraria lobata* and their Nitric Oxide Inhibitory Activities in Macrophages**

**Mun Seok Jo <sup>1</sup>, Jae Sik Yu <sup>1</sup>, Joo Chan Lee <sup>1</sup>, Seoyoung Lee <sup>2</sup>, Young-Chang Cho <sup>2</sup>, Hyun-Ju Park <sup>1</sup>, and Ki Hyun Kim <sup>1,\*</sup>**

<sup>1</sup>School of Pharmacy, Sungkyunkwan University, Suwon 16419, Republic of Korea

<sup>2</sup>College of Pharmacy, Chonnam National University, Gwangju 61186, Republic of Korea

## Supporting Information Contents:

|                                                                                                   |     |
|---------------------------------------------------------------------------------------------------|-----|
| <b>Figure S1.</b> The HR-ESIMS data of <b>1</b> .....                                             | S3  |
| <b>Figure S2.</b> The UV spectrum of <b>1</b> .....                                               | S4  |
| <b>Figure S3.</b> The <sup>1</sup> H NMR spectrum of <b>1</b> (CD <sub>3</sub> OD, 850 MHz).....  | S5  |
| <b>Figure S4.</b> The <sup>1</sup> H- <sup>1</sup> H COSY spectrum of <b>1</b> .....              | S6  |
| <b>Figure S5.</b> The HSQC spectrum of <b>1</b> .....                                             | S7  |
| <b>Figure S6.</b> The HMBC spectrum of <b>1</b> .....                                             | S8  |
| <b>Figure S7.</b> The HR-ESIMS data of <b>2</b> .....                                             | S9  |
| <b>Figure S8.</b> The UV spectrum of <b>2</b> .....                                               | S10 |
| <b>Figure S9.</b> The <sup>1</sup> H NMR spectrum of <b>2</b> (CD <sub>3</sub> OD, 850 MHz).....  | S11 |
| <b>Figure S10.</b> The <sup>1</sup> H- <sup>1</sup> H COSY spectrum of <b>2</b> .....             | S12 |
| <b>Figure S11.</b> The HSQC spectrum of <b>2</b> .....                                            | S13 |
| <b>Figure S12.</b> The HMBC spectrum of <b>2</b> .....                                            | S14 |
| <b>Figure S13.</b> The HR-ESIMS data of <b>3</b> .....                                            | S15 |
| <b>Figure S14.</b> The UV spectrum of <b>3</b> .....                                              | S16 |
| <b>Figure S15.</b> The <sup>1</sup> H NMR spectrum of <b>3</b> (CD <sub>3</sub> OD, 850 MHz)..... | S17 |
| <b>Figure S16.</b> The <sup>1</sup> H- <sup>1</sup> H COSY spectrum of <b>3</b> .....             | S18 |
| <b>Figure S17.</b> The HSQC spectrum of <b>3</b> .....                                            | S19 |
| <b>Figure S18.</b> The HMBC spectrum of <b>3</b> .....                                            | S20 |
| <b>General Experimental Procedures</b> .....                                                      | S21 |
| <b>Extraction and Isolation</b> .....                                                             | S22 |
| <b>Acid Hydrolysis and Determination of the Absolute Configuration of Sugar Moieties</b> .....    | S23 |
| <b>Computational Analysis</b> .....                                                               | S24 |

**Figure S1.** The HR-ESIMS data of **1**

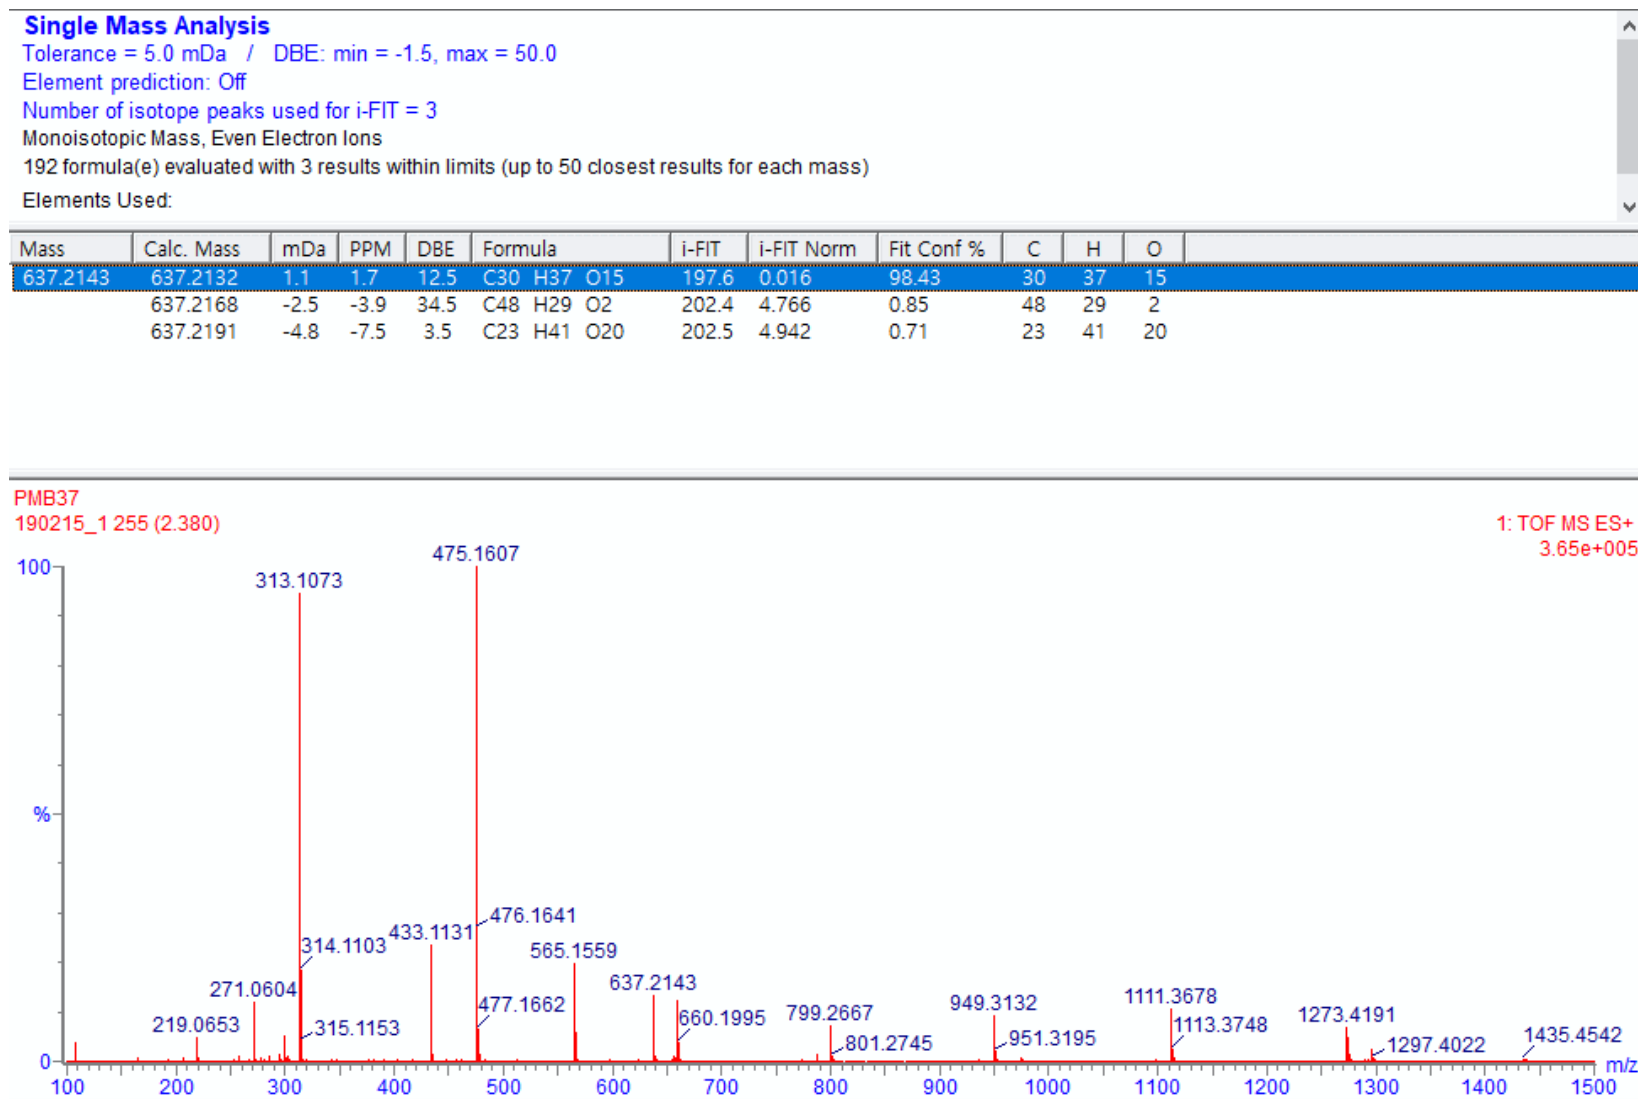

**Figure S2.** The UV spectrum of **1**

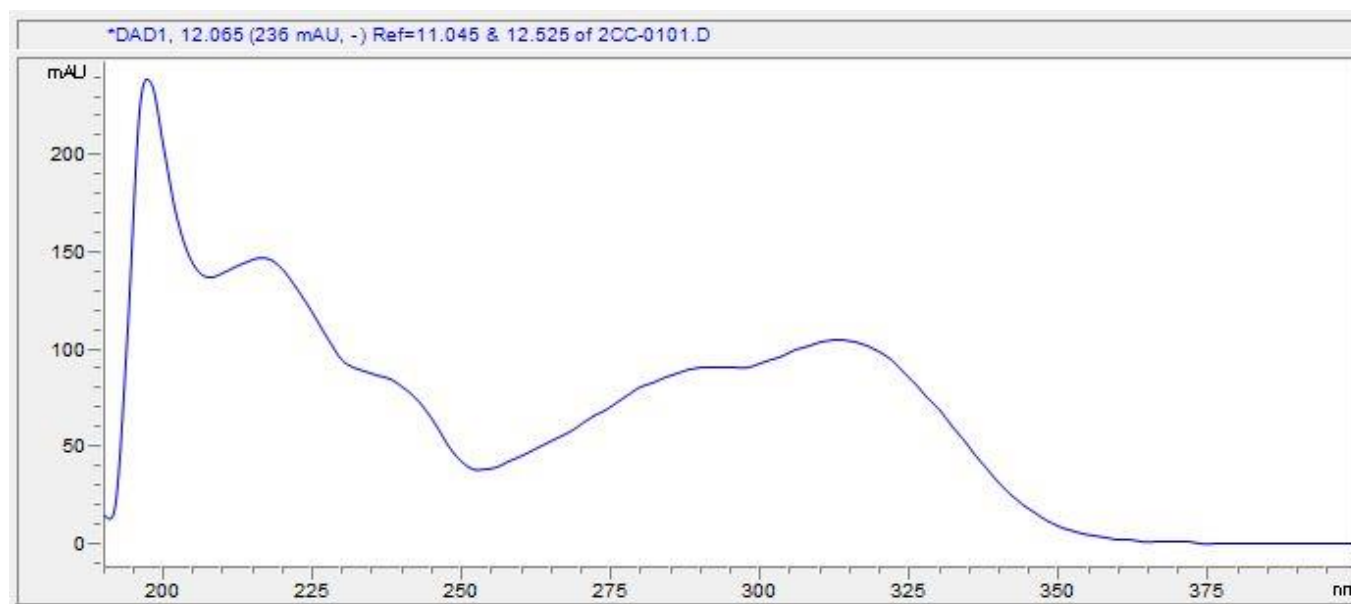

**Figure S3.** The  $^1\text{H}$  NMR spectrum of **1** ( $\text{CD}_3\text{OD}$ , 850 MHz)

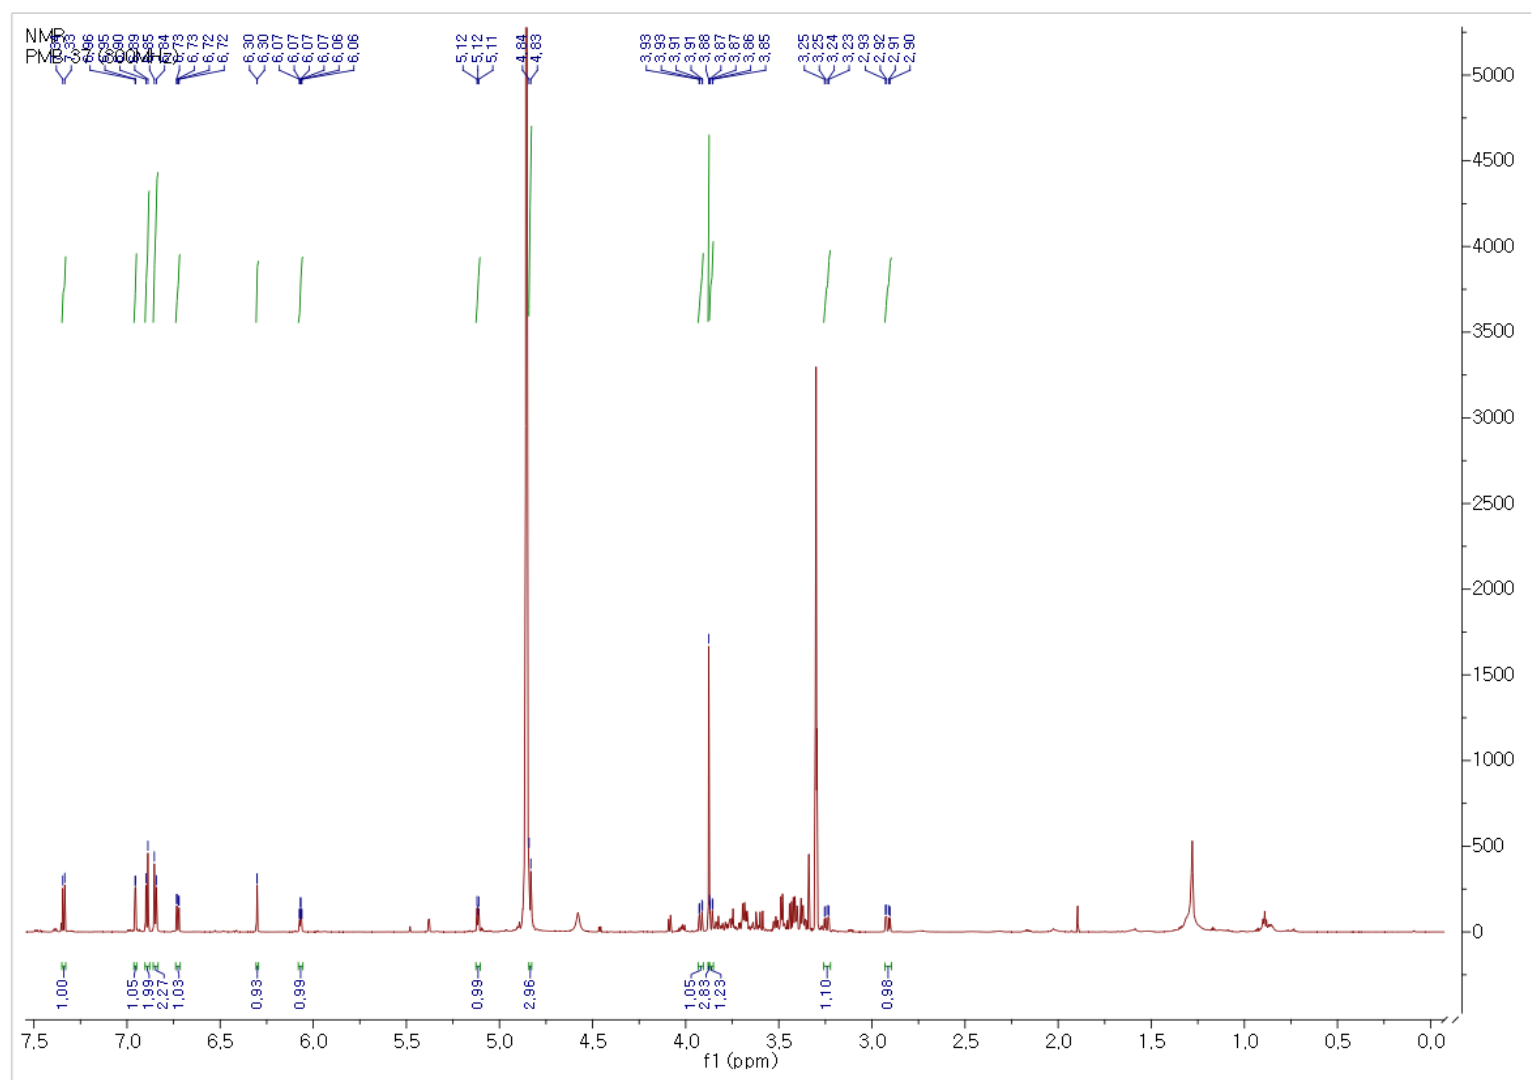

**Figure S4.** The  $^1\text{H}$ - $^1\text{H}$  COSY spectrum of **1**

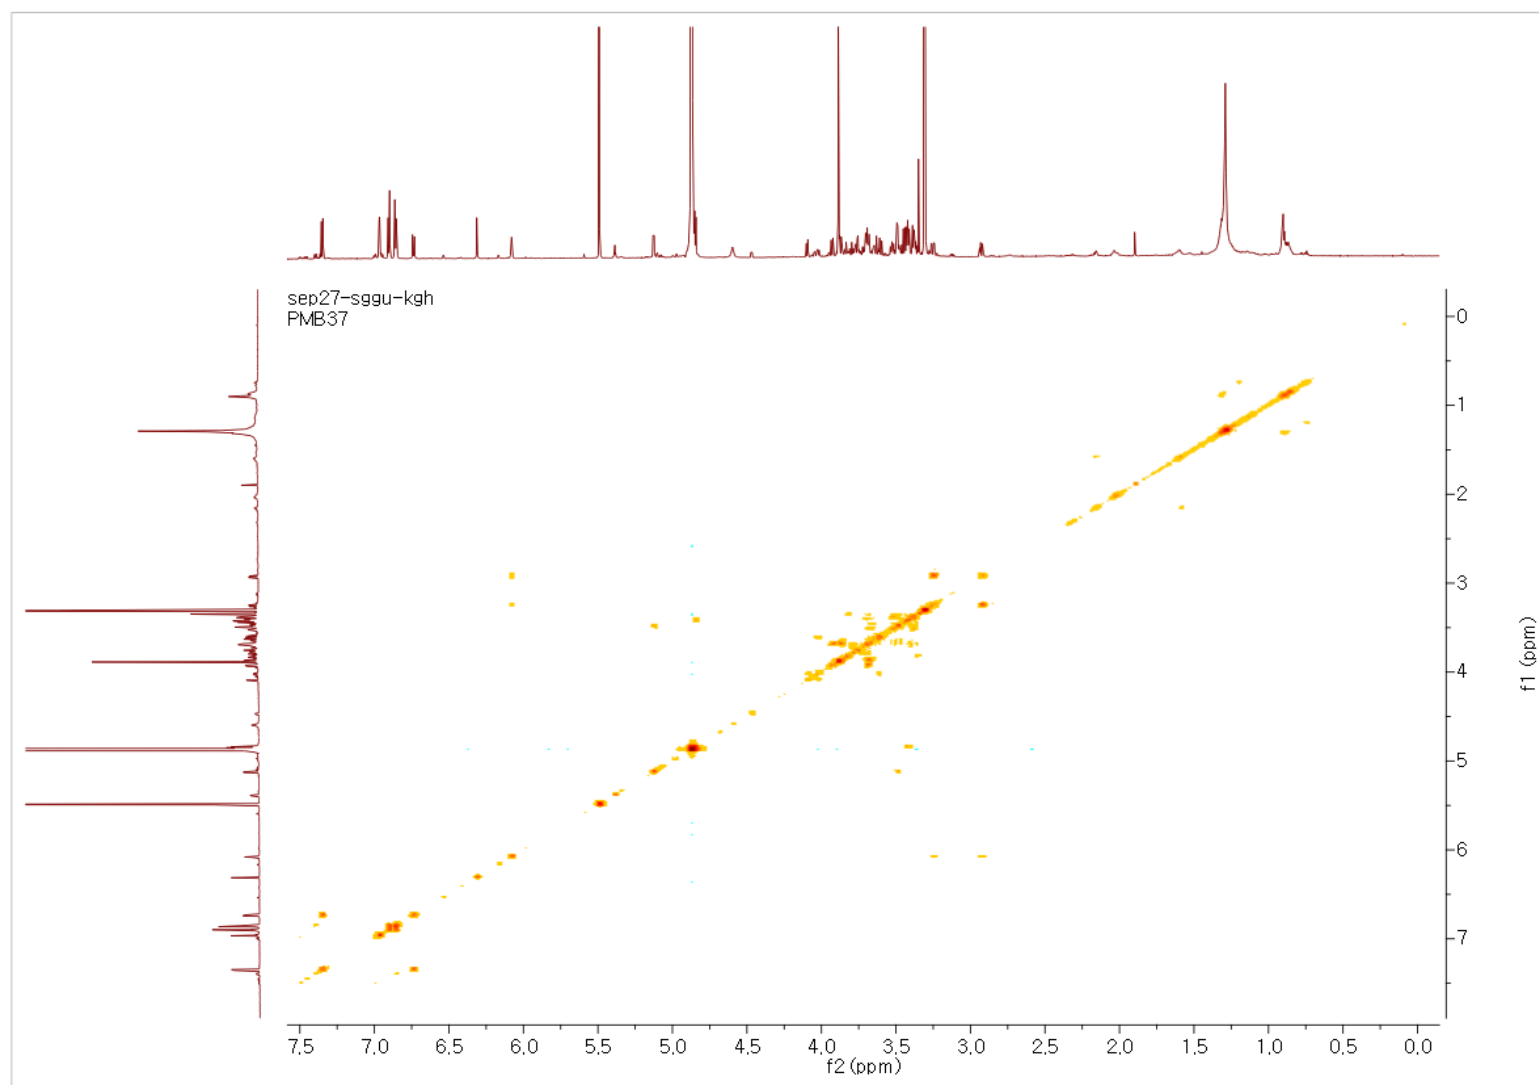

**Figure S5.** The HSQC spectrum of **1**

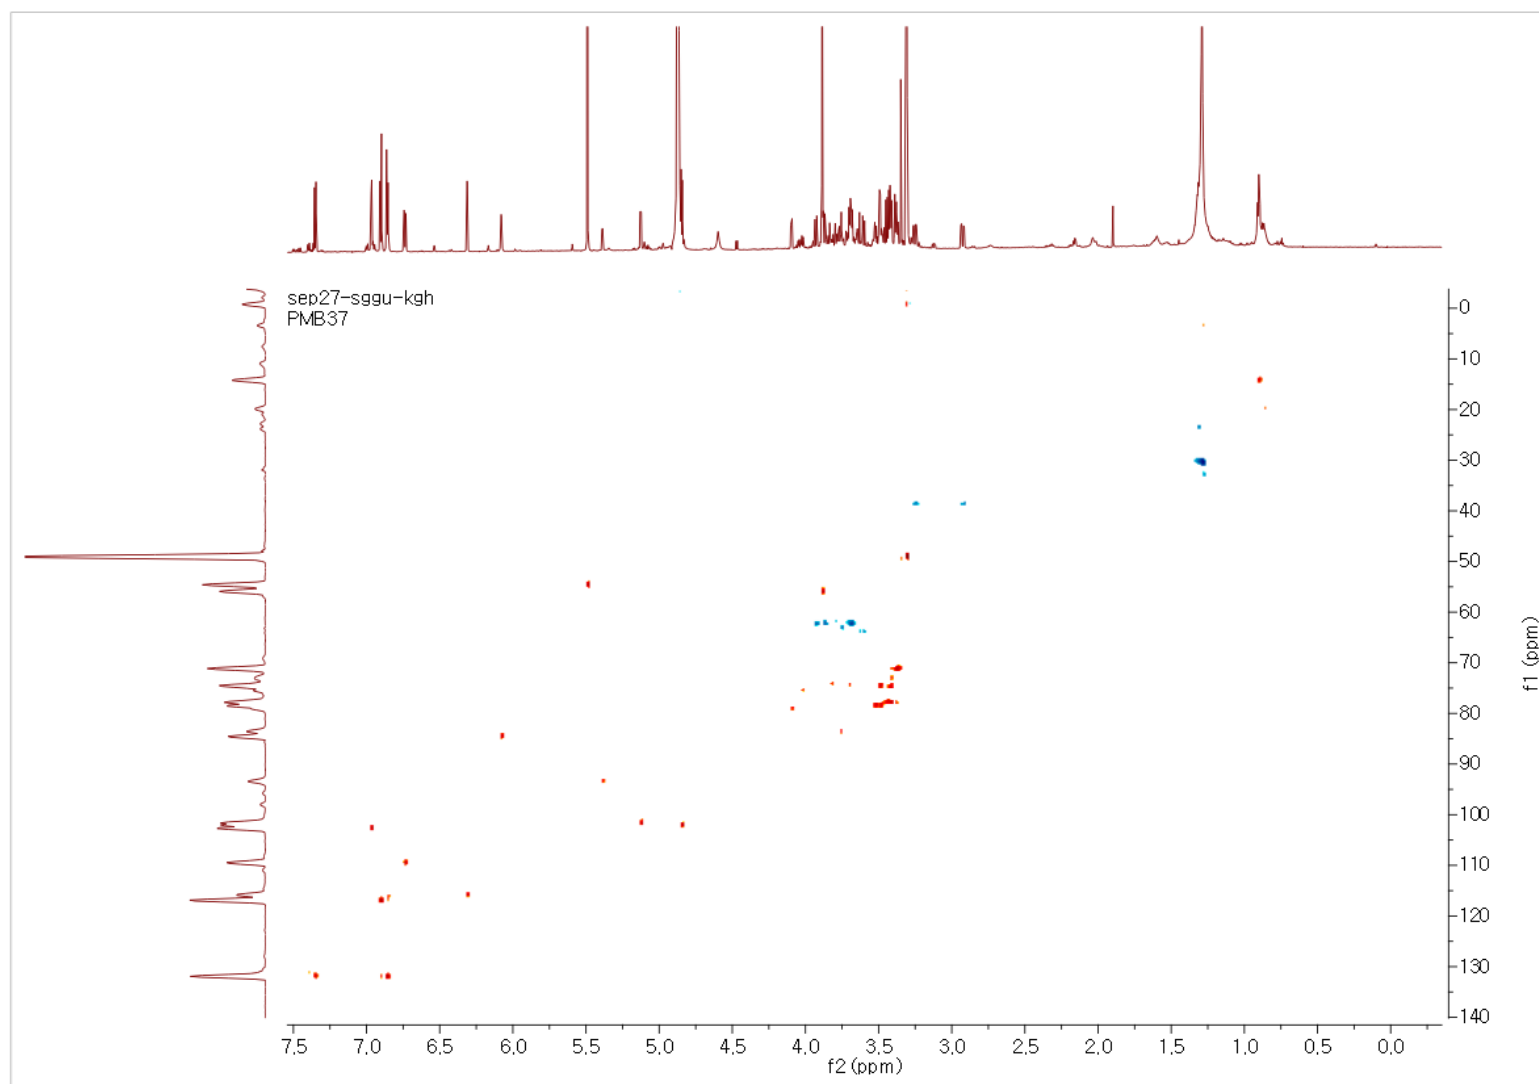

**Figure S6.** The HMBC spectrum of **1**

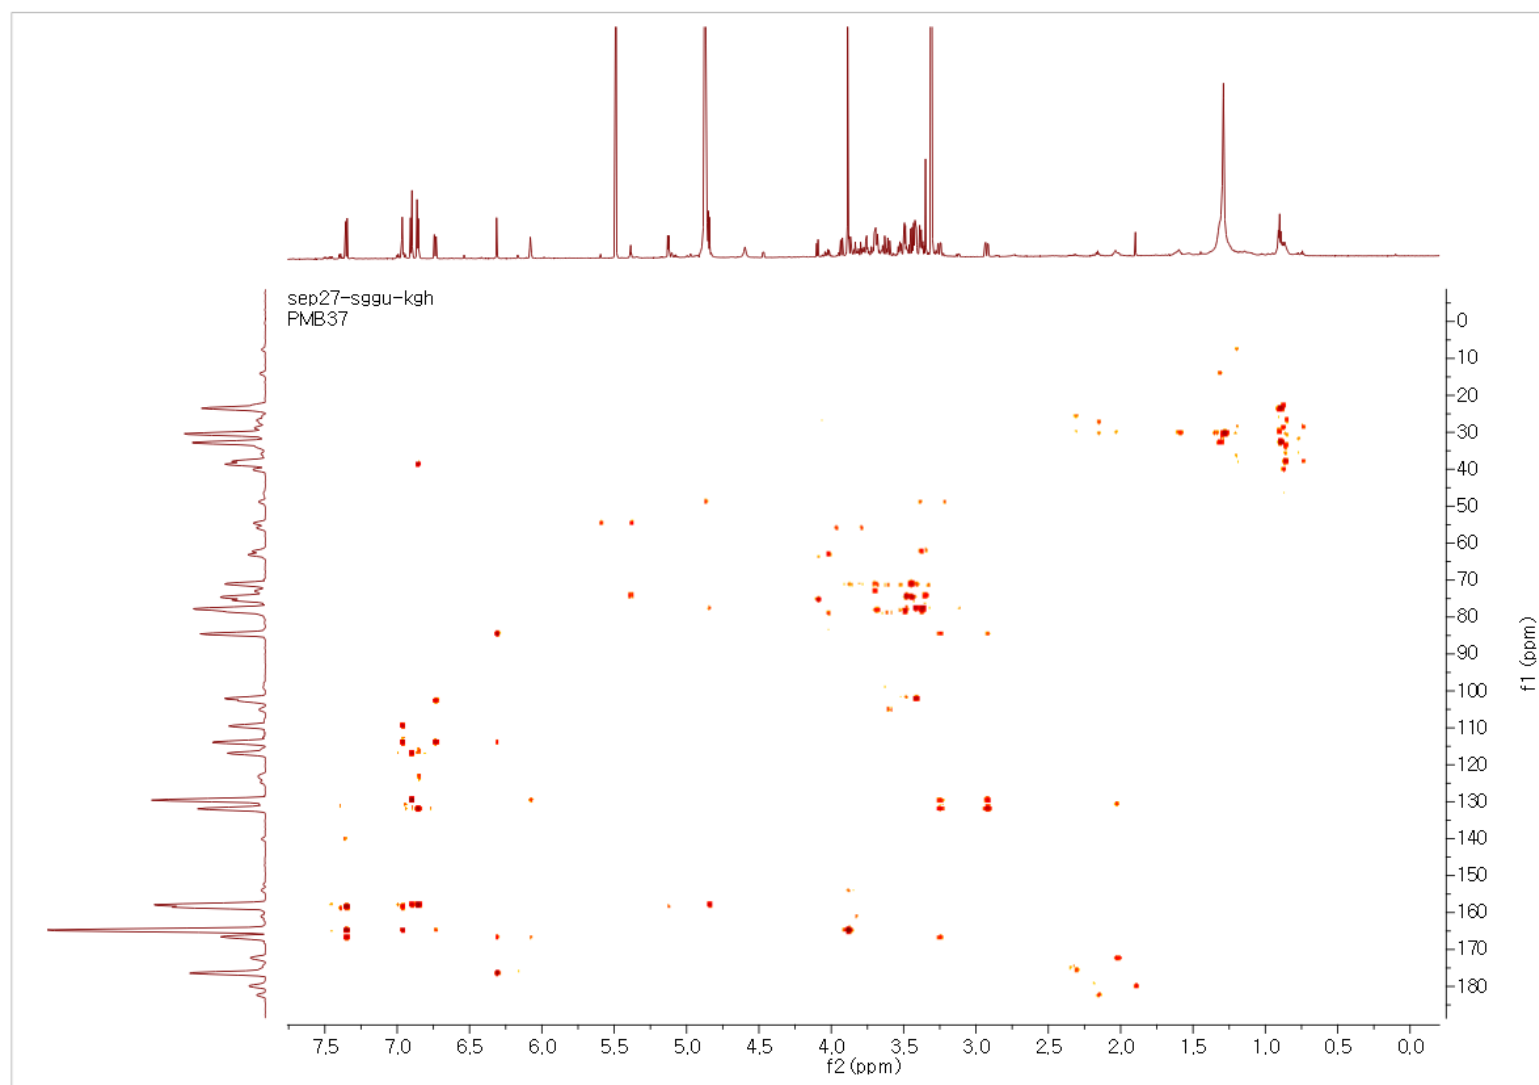

**Figure S7.** The HR-ESIMS data of **2**

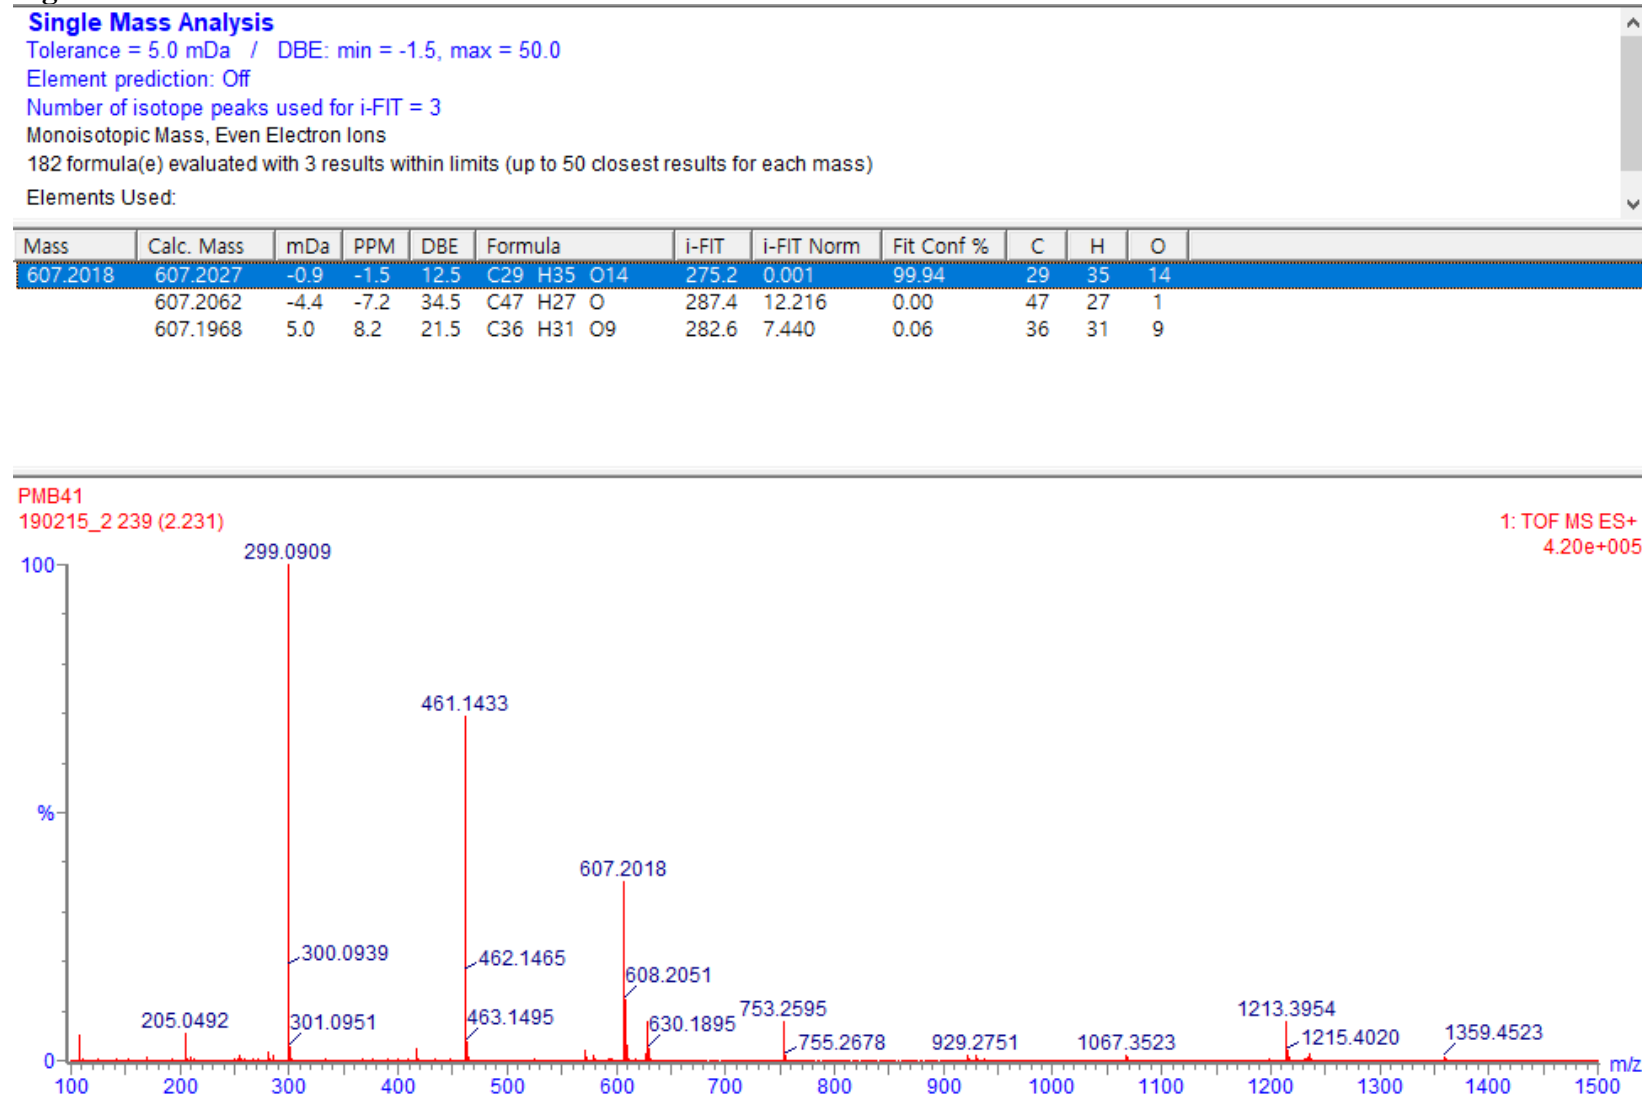

**Figure S8.** The UV spectrum of **2**

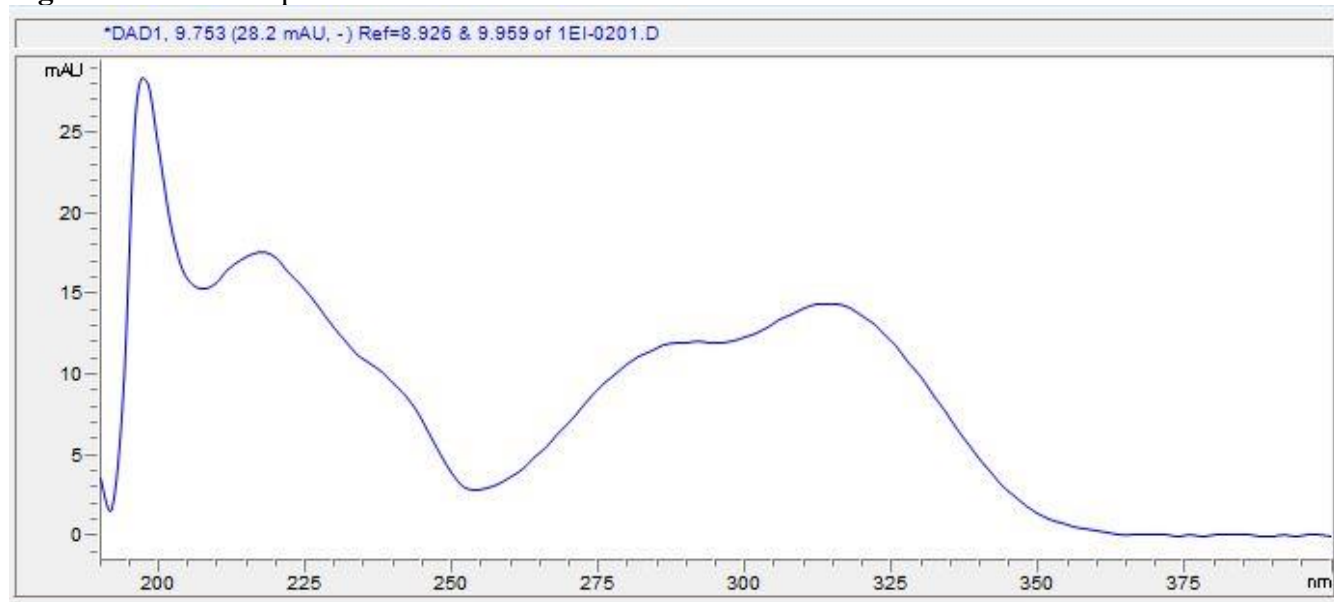

**Figure S9.** The  $^1\text{H}$  NMR spectrum of **2** ( $\text{CD}_3\text{OD}$ , 850 MHz)

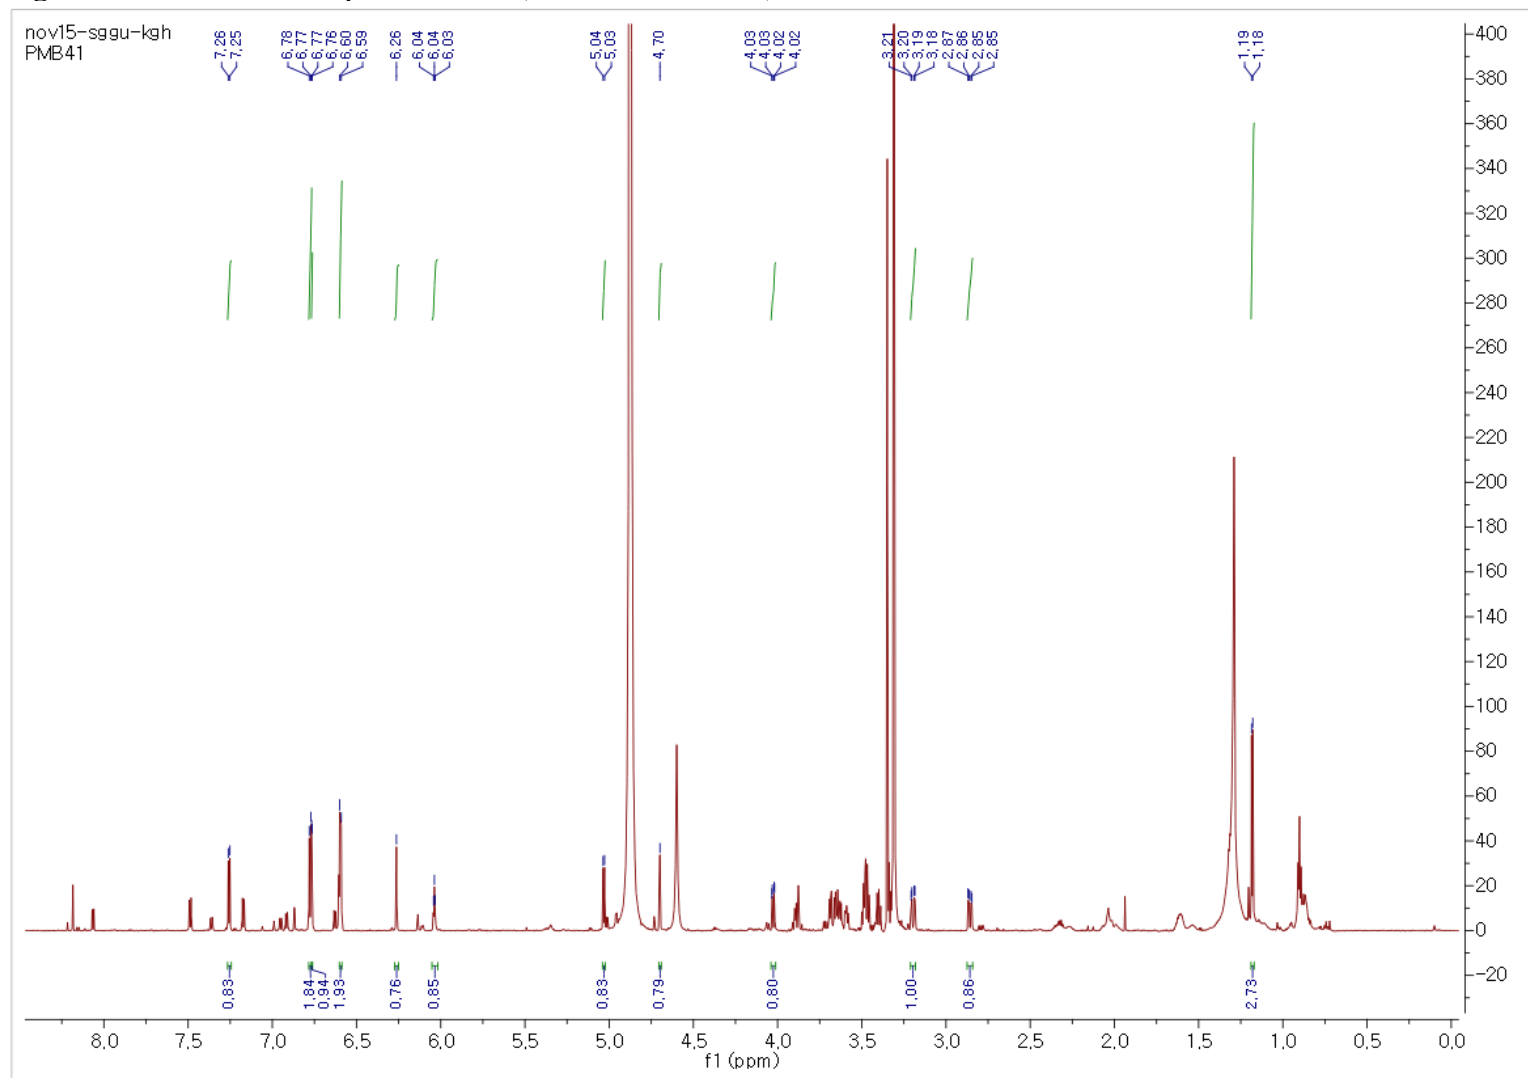

**Figure S10.** The  $^1\text{H}$ - $^1\text{H}$  COSY spectrum of **2**

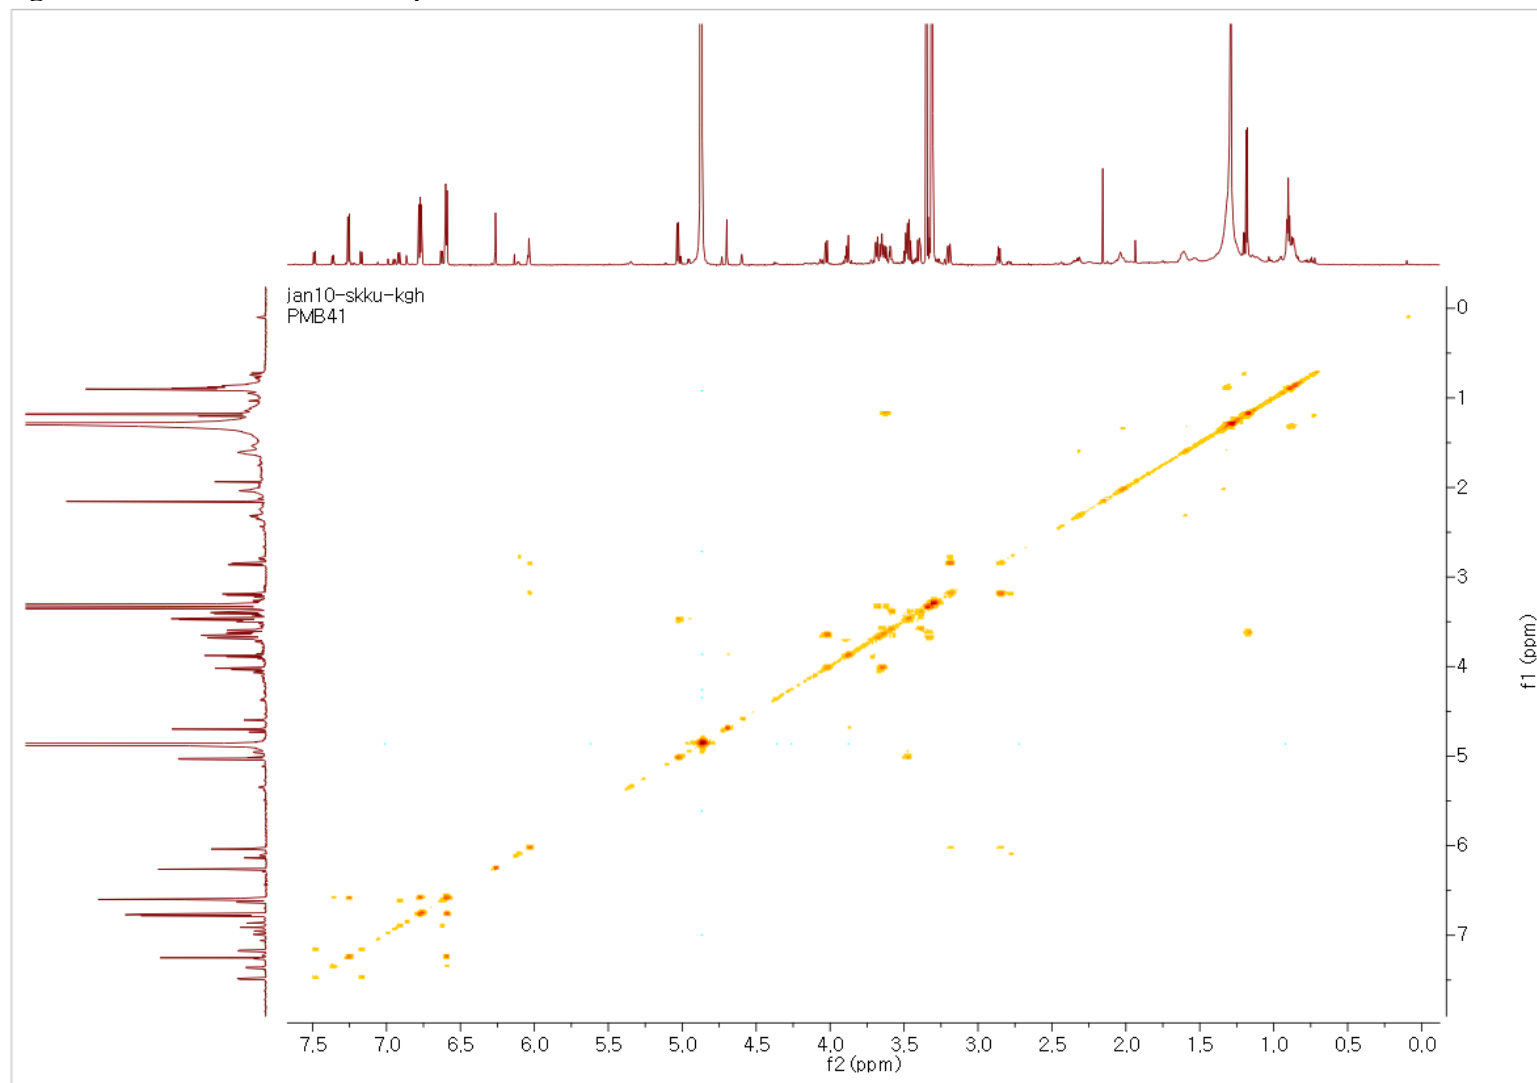

**Figure S11.** The HSQC spectrum of **2**

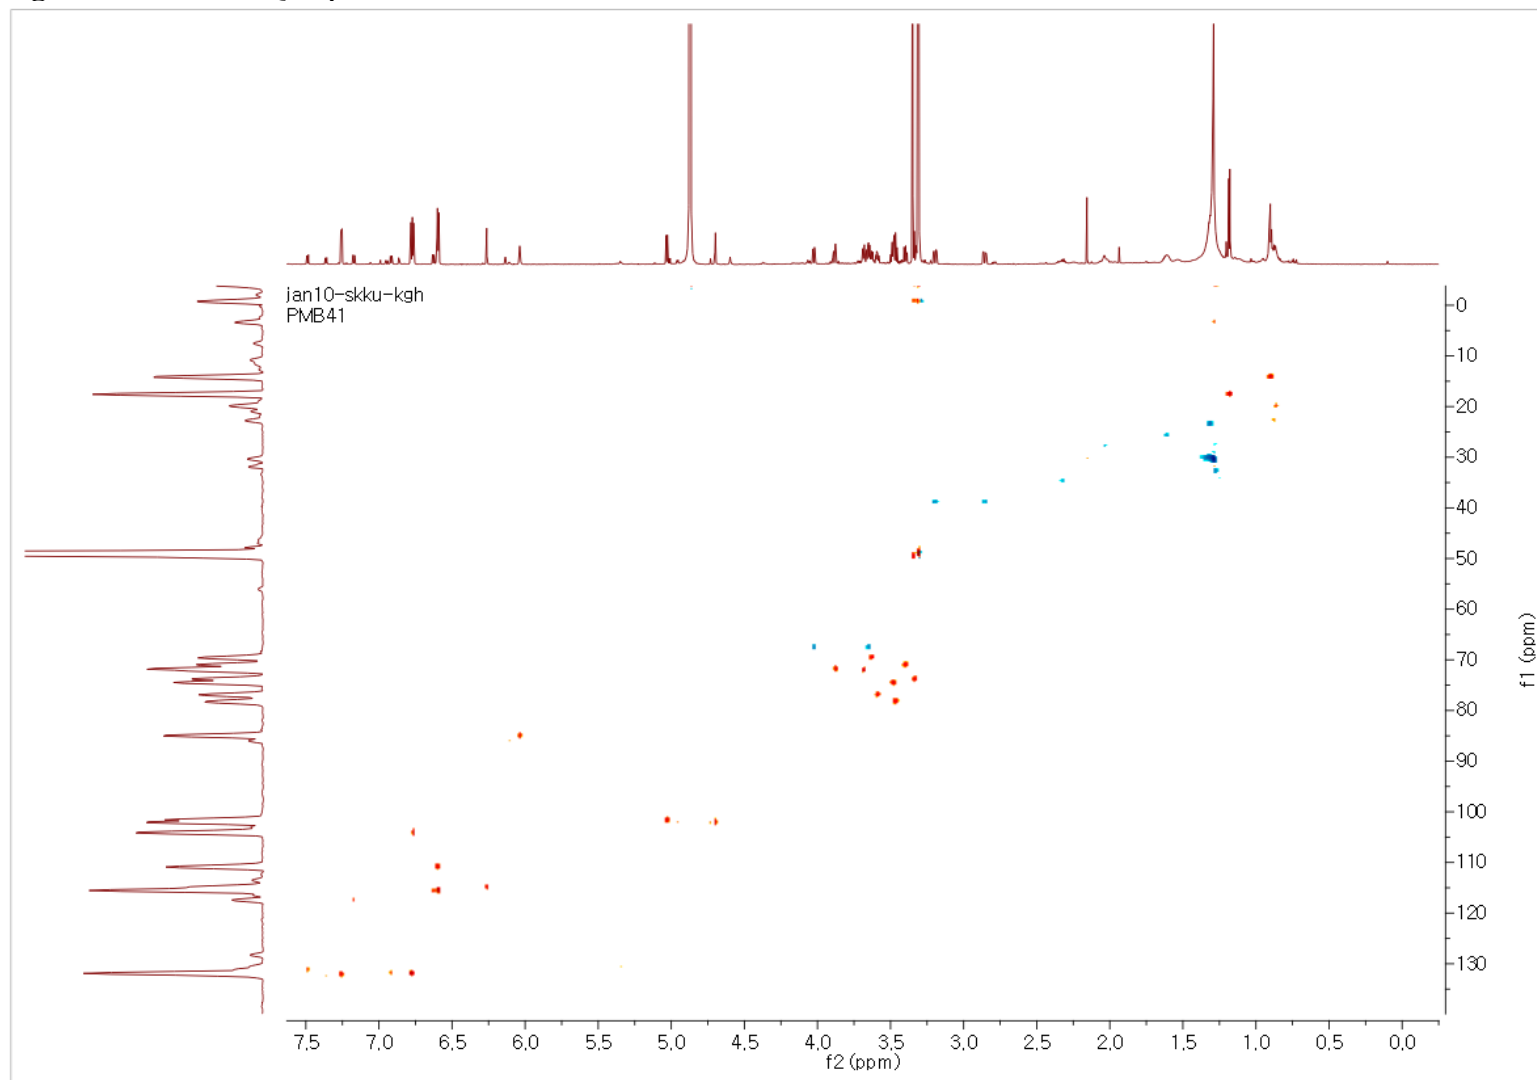

**Figure S12.** The HMBC spectrum of **2**

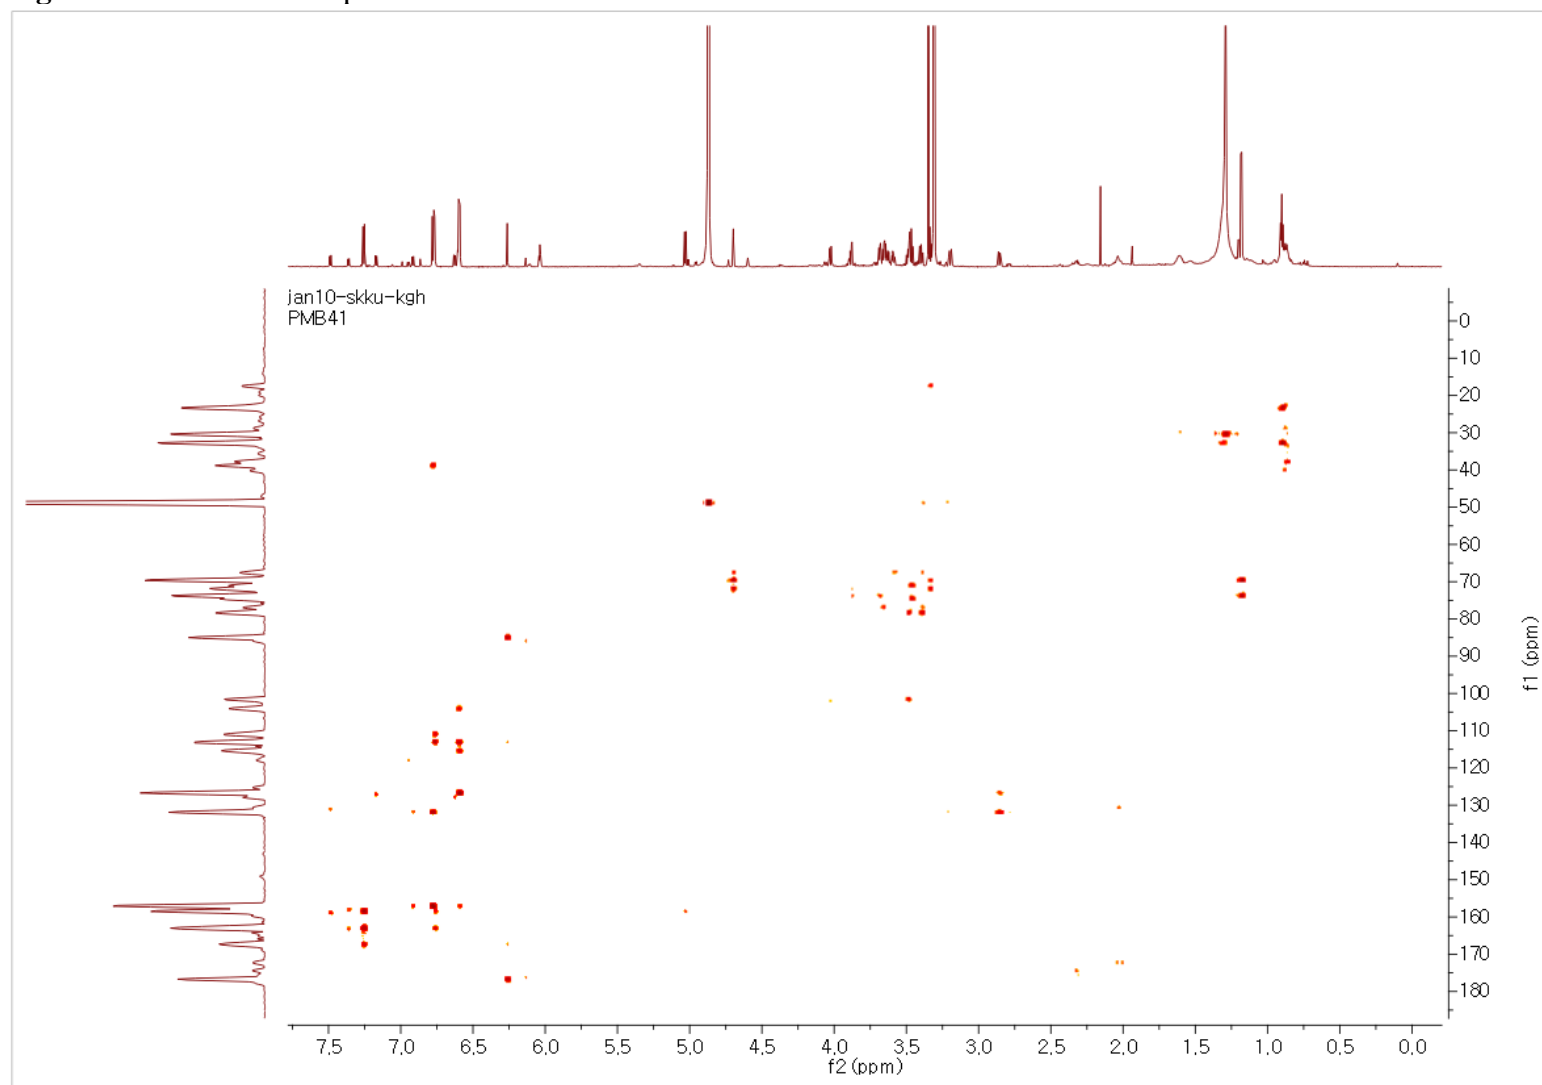

**Figure S13.** The HR-ESIMS data of **3**

**Single Mass Analysis**

Tolerance = 5.0 mDa / DBE: min = -1.5, max = 50.0

Element prediction: Off

Number of isotope peaks used for i-FIT = 3

Monoisotopic Mass, Even Electron Ions

192 formula(e) evaluated with 2 results within limits (up to 50 closest results for each mass)

Elements Used:

| Mass     | Calc. Mass | mDa  | PPM  | DBE  | Formula     | i-FIT | i-FIT Norm | Fit Conf % | C  | H  | O  |
|----------|------------|------|------|------|-------------|-------|------------|------------|----|----|----|
| 637.2126 | 637.2132   | -0.6 | -0.9 | 12.5 | C30 H37 O15 | 314.6 | 0.000      | 100.00     | 30 | 37 | 15 |
|          | 637.2168   | -4.2 | -6.6 | 34.5 | C48 H29 O2  | 325.7 | 11.075     | 0.00       | 48 | 29 | 2  |

PMB42

190215\_3 257 (2.398)

1: TOF MS ES+  
9.19e+005

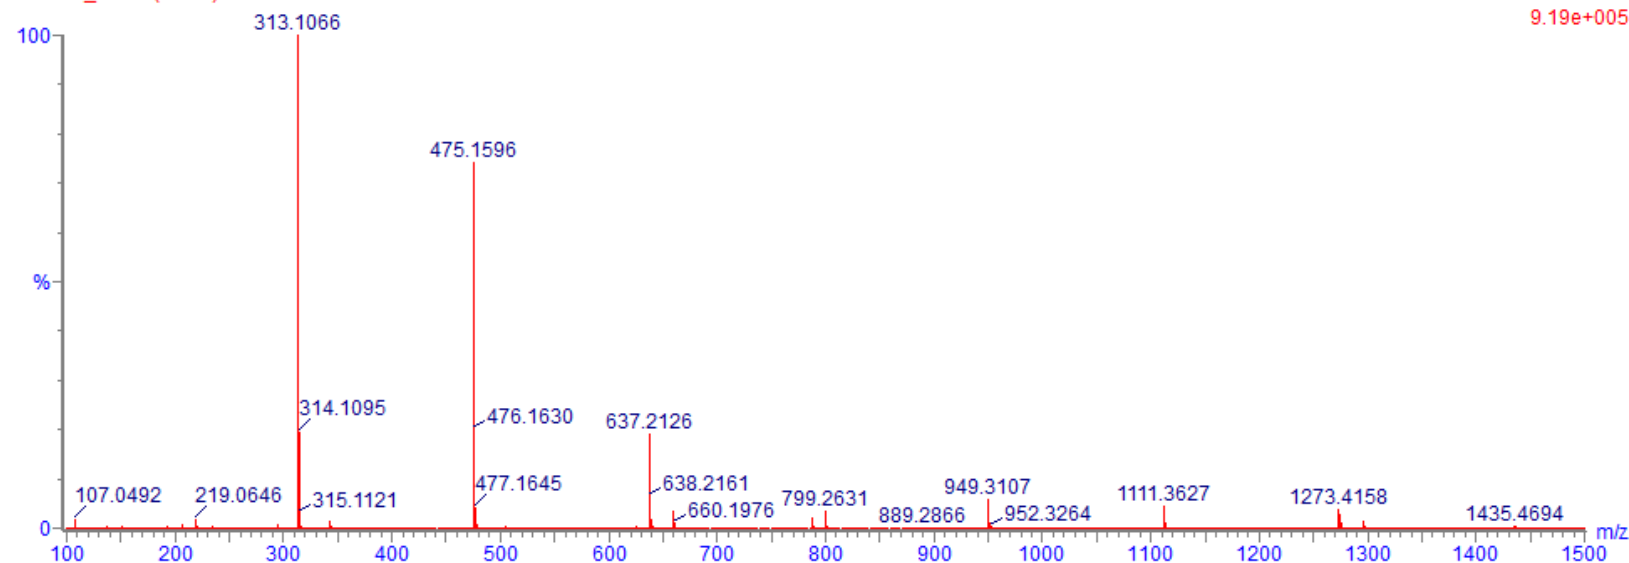

**Figure S14.** The UV spectrum of **3**

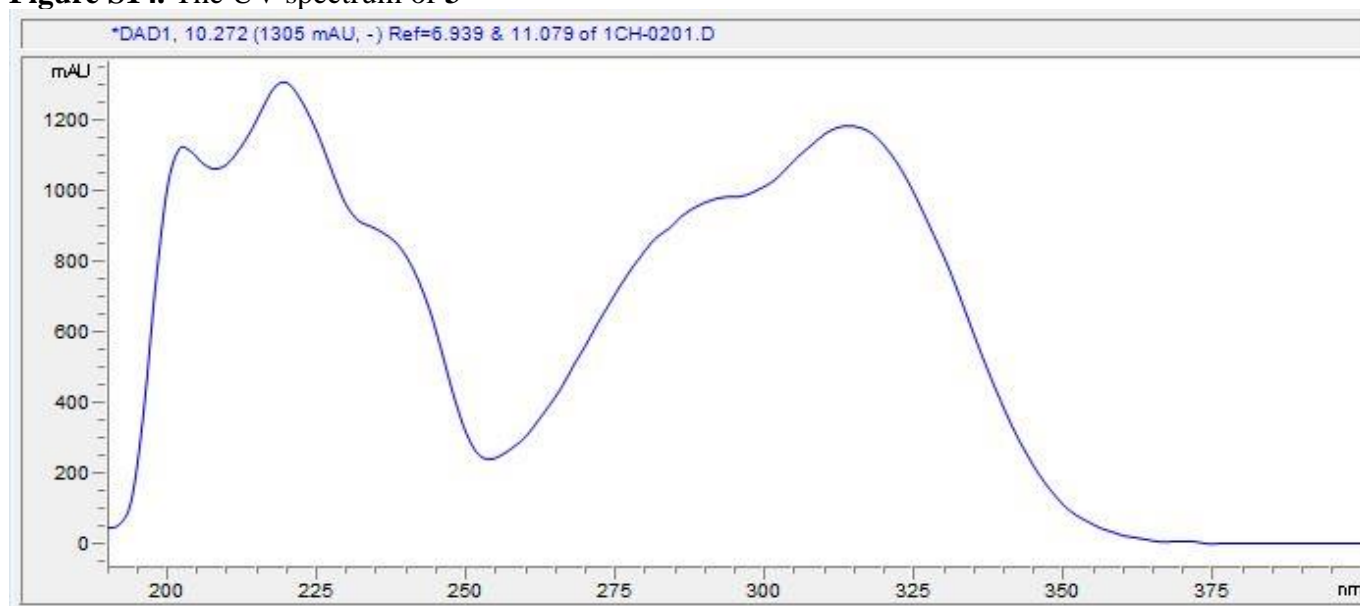

**Figure S15.** The  $^1\text{H}$  NMR spectrum of **3** ( $\text{CD}_3\text{OD}$ , 850 MHz)

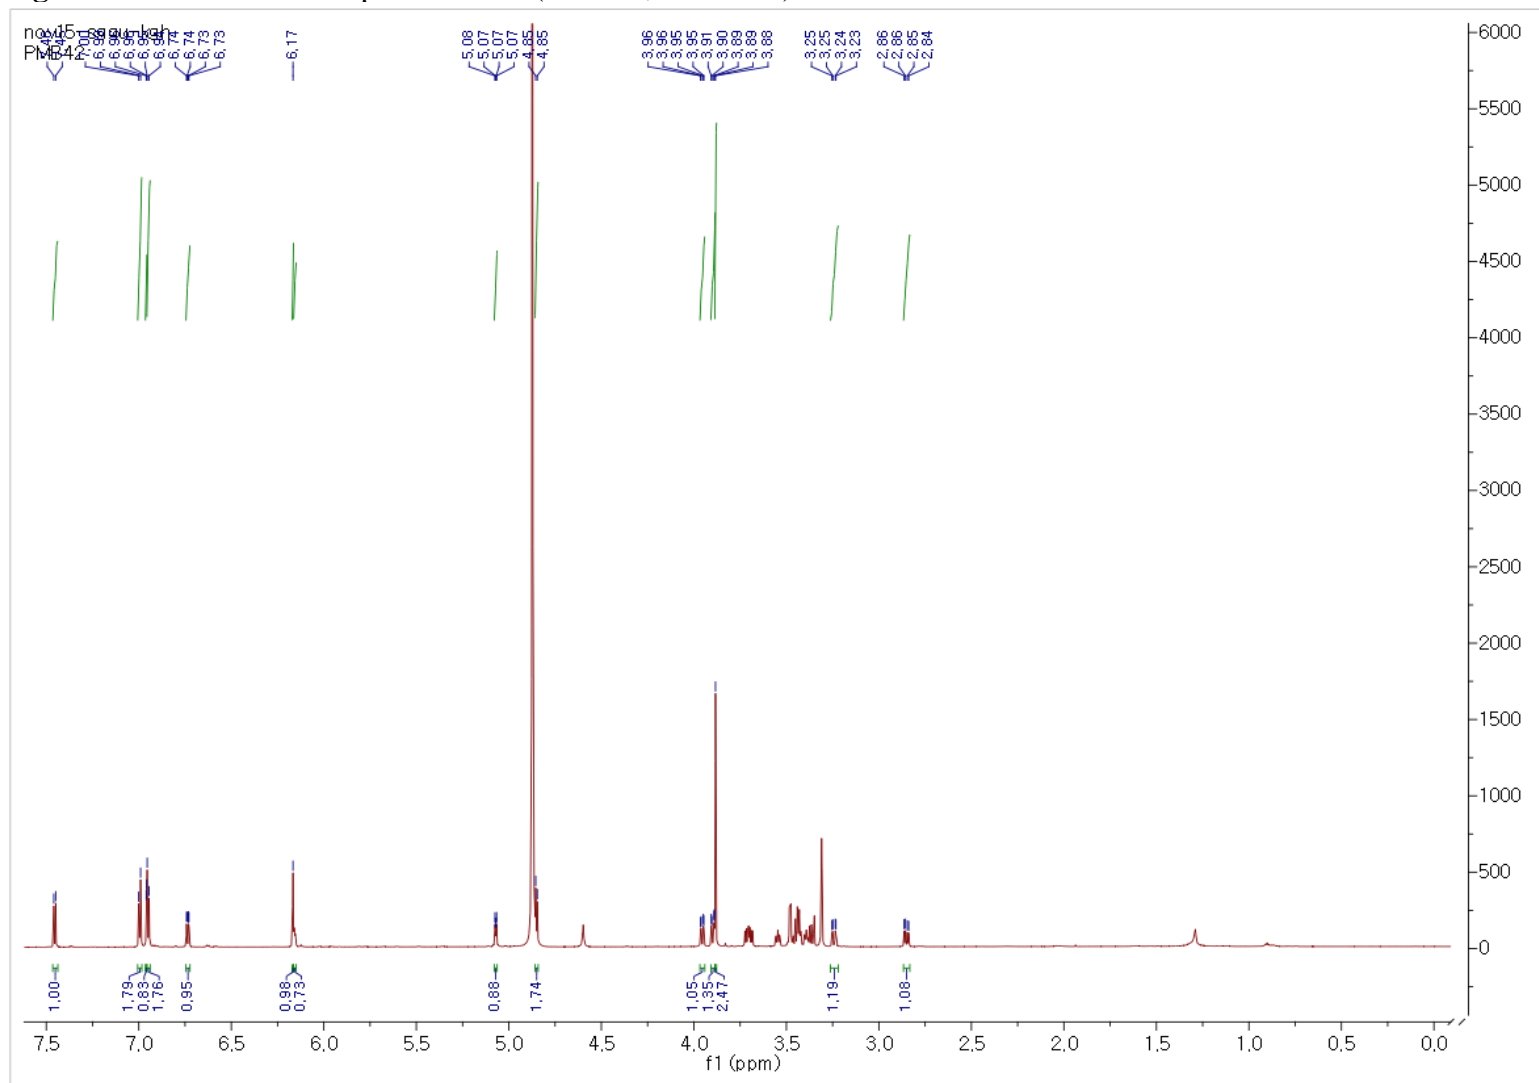



**Figure S17.** The HSQC spectrum of **3**

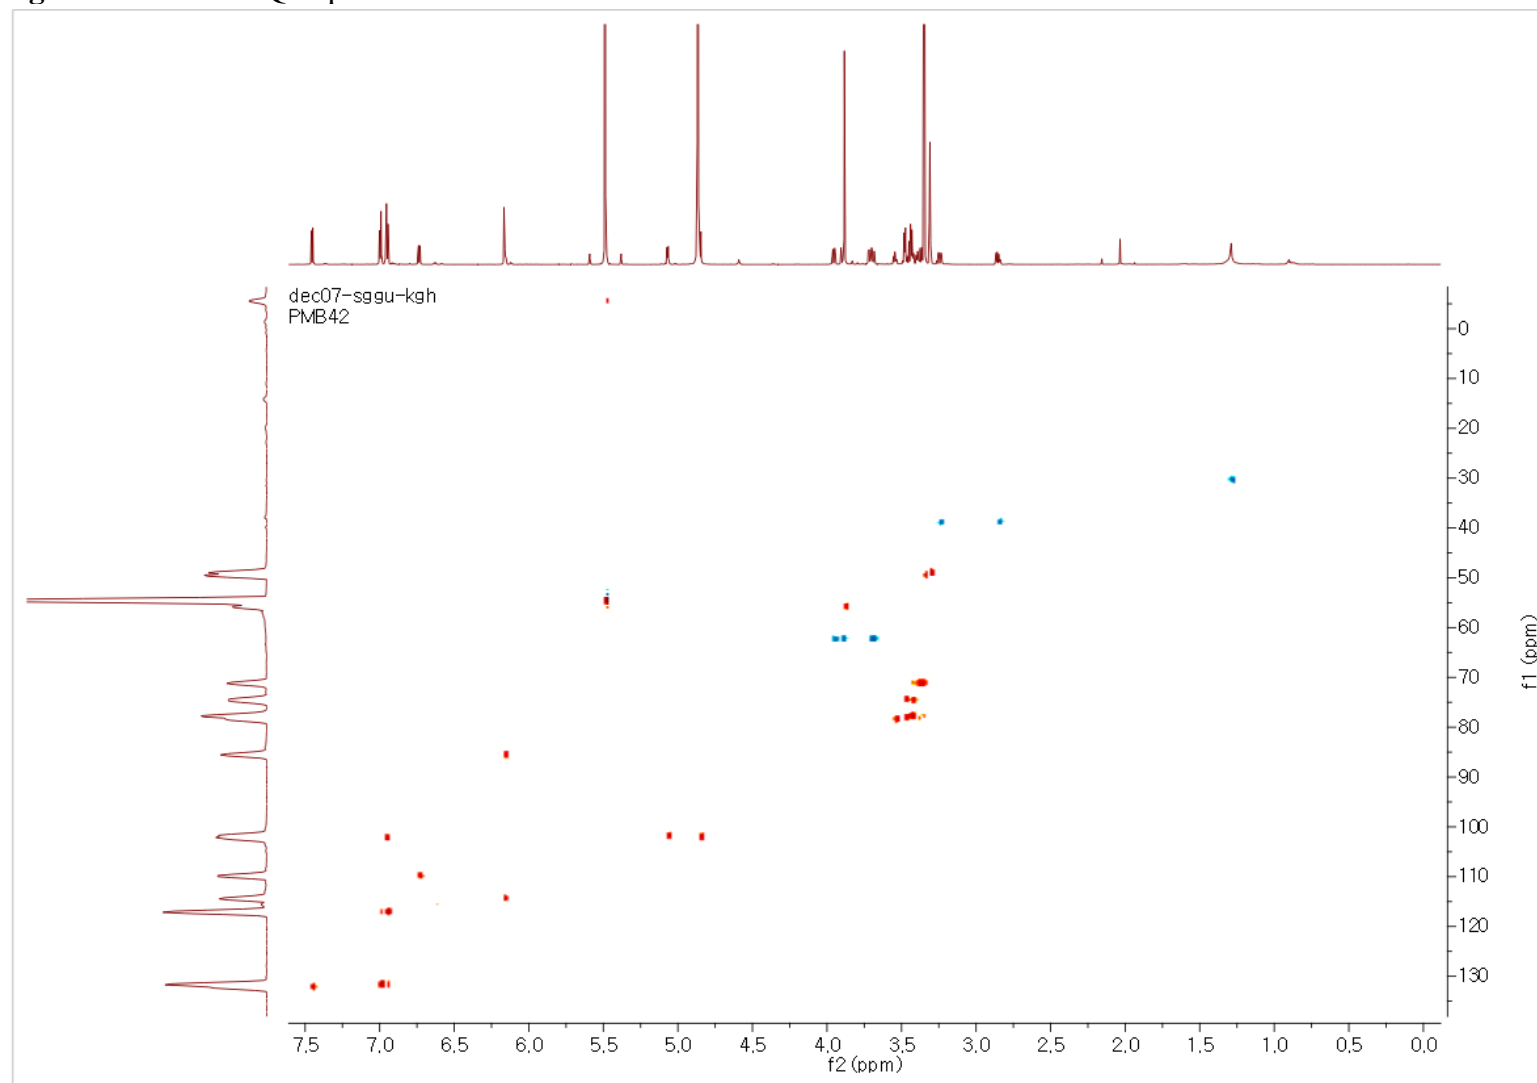

**Figure S18.** The HMBC spectrum of **3**

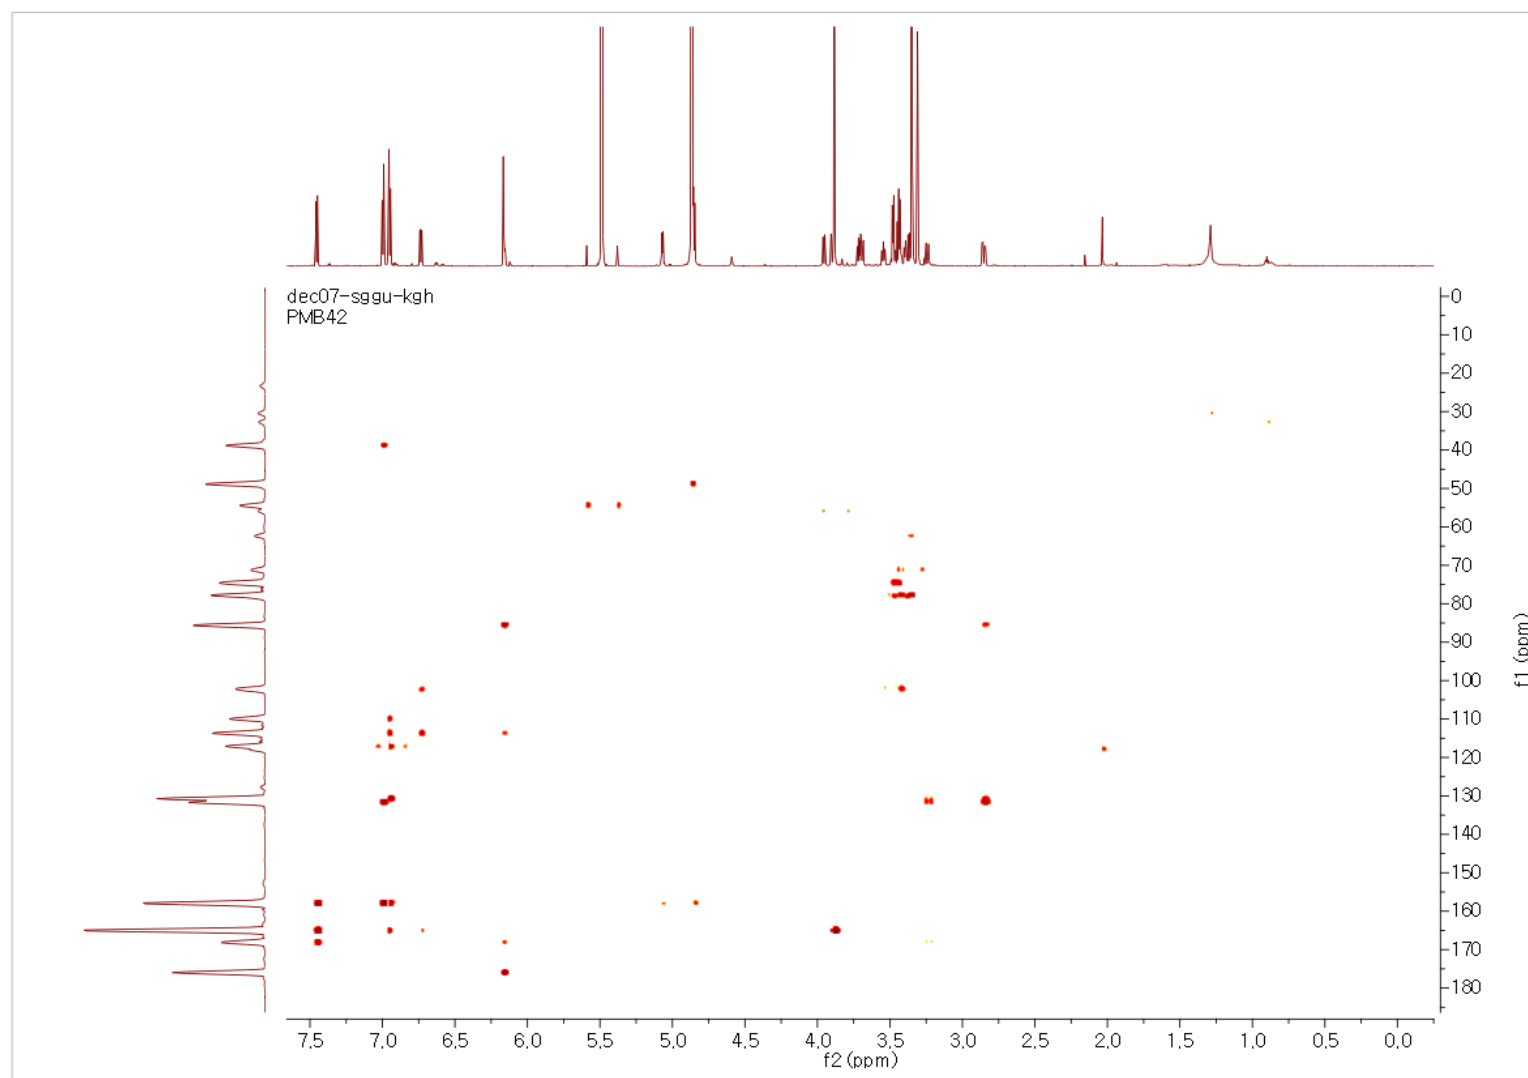

**General Experimental Procedures.** Optical rotations were measured using a JASCO P-2000 polarimeter (JASCO, Easton, MD, USA). Ultraviolet (UV) spectra were acquired using an Agilent 8453 UV-visible spectrophotometer (Agilent Technologies, Santa Clara, CA, USA). Electronic circular dichroism (ECD) spectra were measured using a JASCO J-1500 spectropolarimeter (JASCO). Infrared (IR) spectra were recorded using a Bruker IFS-66/S FT-IR spectrometer (Bruker, Karlsruhe, Germany). Nuclear magnetic resonance (NMR) spectra were recorded using a Bruker AVANCE III HD 850 NMR spectrometer with a 5 mm TCI CryoProbe operating at 850 MHz ( $^1\text{H}$ ) and 212.5 MHz ( $^{13}\text{C}$ ), with chemical shifts given in ppm ( $\delta$ ) for  $^1\text{H}$  and  $^{13}\text{C}$  NMR analyses. All HRESIMS data were obtained using a Waters Xevo G2 QTOF mass spectrometer and a Synapt G2 HDMS quadrupole time-of-flight (TOF) mass spectrometer (Waters). Preparative high-performance liquid chromatography (HPLC) was performed using a Waters 1525 Binary HPLC pump with a Waters 996 Photodiode Array Detector (Waters Corporation, Milford, MA, USA) and an Agilent Eclipse C<sub>18</sub> column (250  $\times$  21.2 mm, 5  $\mu\text{m}$ ; flow rate: 5 mL/min; Agilent Technologies). Semi-preparative HPLC was performed using a Shimadzu Prominence HPLC System with SPD-20A/20AV Series Prominence HPLC UV-Vis detectors (Shimadzu, Tokyo, Japan) and a Phenomenex Luna C<sub>18</sub> column (250  $\times$  10 mm, 5  $\mu\text{m}$ ; flow rate: 2 mL/min; Phenomenex, Torrance, CA, USA). LC/MS analysis was performed using an Agilent 1200 Series HPLC system equipped with a diode array detector and a 6130 Series ESI mass spectrometer using an analytical Kinetex C<sub>18</sub> 100 Å column (100  $\times$  2.1 mm, 5  $\mu\text{m}$ ; flow rate: 0.3 mL/min; Phenomenex). Silica gel 60 (230-400 mesh; Merck, Darmstadt, Germany) and RP-C<sub>18</sub> silica gel (Merck, 230-400 mesh) were used for column chromatography. The packing material for molecular sieve column chromatography was Sephadex LH-20 (Pharmacia, Uppsala, Sweden).

Thin-layer chromatography (TLC) was performed using precoated silica gel F<sub>254</sub> plates and RP-C<sub>18</sub> F<sub>254s</sub> plates (Merck), and spots were detected under UV light or by heating after spraying with anisaldehyde-sulfuric acid.

**Extraction and Isolation.** The dried *P. lobata* roots (500 g) were extracted using 80% MeOH (20 h × 3) at room temperature. The extract was finely filtered and evaporated under reduced pressure using a rotary evaporator to obtain the MeOH extract (206.7 g), which was suspended in distilled water (700 mL). This extract was then solvent-partitioned using hexane, dichloromethane (CH<sub>2</sub>Cl<sub>2</sub>), ethyl acetate (EtOAc), and *n*-butanol (BuOH). Solvent partitioning resulted in four layers of hexane (4.5 g), CH<sub>2</sub>Cl<sub>2</sub> (0.9 g), EtOAc (18.1 g), and BuOH (110 g) soluble fractions. Upon comparison with a house-built UV library, LC/MS analysis data of the four fractions obtained through solvent partitioning indicated the presence of norlignans in the BuOH soluble fraction.

The BuOH soluble fraction (110 g) was subjected to HP-20 column chromatography (CC) using water and MeOH to obtain water soluble and MeOH soluble fractions. The MeOH fraction was chromatographed on silica gel (CH<sub>2</sub>Cl<sub>2</sub>/MeOH/H<sub>2</sub>O, 9:3:0.5 to 1:1:0, v/v/v), yielding four subfractions (B1 - B4). Fraction B3 (18.1 g) was then subjected to C<sub>18</sub> reversed-phase silica gel CC (MeOH/H<sub>2</sub>O, 40:60 to 100:0) to yield two subfractions (B31 and B32). Subfraction B31 (14.6 g) was fractionated using HP-20 CC (MeOH/H<sub>2</sub>O, 0% to 100% MeOH) to afford six subfractions (B311 - B316). Subfraction B315 (1.1 g) was separated by silica gel CC (CH<sub>2</sub>Cl<sub>2</sub>/MeOH/H<sub>2</sub>O, 5:1:0.15 to 1:1:0.2, v/v/v) to yield seven subfractions (B3151 - B3157). Using a Sephadex LH-20 column (100% MeOH), subfraction B3153 (163 mg) was divided into four subfractions (B31531 - B31534). Subfraction B31531 (15.6 mg) was purified by semi-preparative HPLC (2 mL/min, 22% aqueous CH<sub>3</sub>CN) using a phenyl-hexyl column to yield compound **4** (*t*<sub>R</sub> 33.0 min, 4.6 mg). Subfraction B31533 (75.6 mg) was separated by semi-preparative

HPLC (2 mL/min, 16% aqueous CH<sub>3</sub>CN) to obtain compounds **5** (*t<sub>R</sub>* 24.0 min, 1.3 mg) and **9** (*t<sub>R</sub>* 28.9 min, 0.8 mg). Subfraction B3154 (288.2 mg) was purified by semi-preparative HPLC (flow rate of 2 mL/min, 16% CH<sub>3</sub>CN/H<sub>2</sub>O) to obtain four subfractions (B31541 - B31544). Subfraction B31543 (22.0 mg) was, then, separated by semi-preparative HPLC (flow rate of 2 mL/min, 13% CH<sub>3</sub>CN/H<sub>2</sub>O) to yield compound **3** (*t<sub>R</sub>* 91.0 min, 1.8 mg). Subfraction B31544 (68.8 mg) was purified by semi-preparative HPLC (flow rate of 2 mL/min, 15% CH<sub>3</sub>CN/H<sub>2</sub>O) to obtain compounds **1** (*t<sub>R</sub>* 46.1 min, 2.5 mg), **2** (*t<sub>R</sub>* 51.6 min, 4.0 mg), and **6** (*t<sub>R</sub>* 55.2 min, 6.1 mg). Preparative HPLC (5 mL/min, 30% to 100% aqueous MeOH) using a C<sub>18</sub> column was performed to fractionate subfraction B3155 (144.4 mg), and 5 subfractions were obtained. Among them, subfraction B31553 (43.6 mg) was purified by semi-preparative HPLC (2 mL/min, 16% aqueous CH<sub>3</sub>CN) to yield compounds **7** (*t<sub>R</sub>* 32.4 min, 7.2 mg) and **8** (*t<sub>R</sub>* 38.7 min, 6.6 mg).

**Acid Hydrolysis and Determination of the Absolute Configuration of Sugar Moieties.** The absolute configuration of the sugar moieties was determined using an LC/MS-UV-based method. Compounds **1-3** (1.0 mg of **1**; 1.0 mg of **2**; 0.5 mg of **3**) were hydrolyzed in the presence of 1 N HCl at 80°C for 2 h, individually, and EtOAc was used for extraction. Each aqueous layer was neutralized through repeated evaporation using a vacuum evaporator and dissolved in anhydrous pyridine (0.5 mL) with the addition of L-cysteine methyl ester hydrochloride (1.0 mg). After the reaction mixture was heated at 60°C for 1 h, *o*-tolylisothiocyanate (50 µL) was added to it, and it was kept at 60°C for 1 h. Each reaction product was evaporated using a vacuum evaporator and dissolved in MeOH. Then, the dissolved reaction products of compound **1** [MeOH/H<sub>2</sub>O, 3:7 → 7:3 gradient system (0 - 30 min), 100% MeOH (31 - 41 min), 0% MeOH (42 - 52 min); 0.3 mL/min]

and compounds **2** and **3** [MeOH/H<sub>2</sub>O, 1:9 → 7:3 gradient system (0 - 30 min), 100% MeOH (31 - 41 min), 0% MeOH (42 - 52 min); 0.3 mL/min] were directly analyzed by LC/MS using an analytical Kinetex C18 100 Å column (100 mm × 2.1 mm i.d., 5 µm). The sugar moiety of **1** was identified as D-glucopyranose based on the comparison of its retention time with that of an authentic sample (*t<sub>R</sub>*: D-glucopyranose 23.0 min). The sugar moieties of **2** were identified as D-glucopyranose and L-rhamnopyranose based on the comparison of their retention times with those of authentic samples (*t<sub>R</sub>*: D-glucopyranose 18.4 min, L-rhamnopyranose 20.2 min). The sugar moiety of **3** was identified as D-glucopyranose by comparison of its retention time with that of an authentic sample (*t<sub>R</sub>*: D-glucopyranose 18.4 min).

**Computational Analysis.** To acquire the conformational optimization of **1a/1b**, computational DFT calculations were carried out. The first structural energy minimization of **1a/1b** was performed using Avogadro 1.2.0 with a UFF force field. The ground-state geometries of **1a/1b** were then established by Tmolex 4.3.1 with DFT settings (B3-LYP functional/M3 grid size), geometry optimization options (energy 10<sup>-6</sup> hartree, gradient norm |dE/dxyz| = 10<sup>-3</sup> hartree/bohr), and the basis set def-SV(P) for all atoms. The calculated ECD spectra of optimized structures were acquired using B3LYP/DFT functional settings with the basis set def2-TZVPP for all atoms. The obtained CD spectra were simulated by overlying each transition, where σ is the width of the band at 1/e height and Δ*E<sub>i</sub>* and *R<sub>i</sub>* are the excitation energies and rotatory strengths for transition *i*, respectively. In the present study, the value of σ was 0.10 eV.

$$\Delta\epsilon(E) = \frac{1}{2.297 \times 10^{-39}} \frac{1}{\sqrt{2\pi\sigma}} \sum_A^i \Delta E_i R_i e^{[-(E-\Delta E_i)^2/(2\sigma)^2]}$$
